# Supplementary material
Source: publisher figshare collection journal article supplement (https://karger.figshare.com/ndownloader/files/13370174)
Supplement: Supplementary file 1 [file 13370174]

**Supplemental Table 1. AKI Etiology agreement between reviewers 1 and 2**

|  | R2 TA | | | | | |
| --- | --- | --- | --- | --- | --- | --- |
| R1 GN | CIN | Hemodynamic | Medication toxicity | CIN + other | Other | Vasculitis |
| CIN | 50 | 6 | 0 | 11 | 0 | 0 |
| Hemodynamic | 1 | 42 | 1 | 0 | 3 | 0 |
| Medication Toxicity | 0 | 1 | 3 | 0 | 0 | 0 |
| CIN + other | 3 | 1 | 0 | 24 | 0 | 0 |
| Other | 1 | 1 | 0 | 0 | 0 | 0 |
| Vasculitis | 0 | 0 | 0 | 0 | 0 | 2 |

Kappa = 0,72 (95% CI: 0.63, 0.81)
